# Supplementary material
Source: PubMed Central journal article supplement (PMC3685245)
Supplement: AEM.00067-13_zam999104379so1.pdf [file AEM.00067-13_zam999104379so1.pdf]

1 TABLE S1. Primers, sequences and their respective function.

2

| Primer           | Sequence (5'-3') <sup>a</sup>                                                     | Function                                        |
|------------------|-----------------------------------------------------------------------------------|-------------------------------------------------|
| <i>lsc</i> -CmF  | ttatgtcagattataattataaaccaacgctgtggactcgtgcc<br>gatca <b>GTGTAGGCTGGAGCTGCTTC</b> | Generation of recombination                     |
| <i>lsc</i> -CmR  | actcactgcctgacaggtctttggccacagccagaccaaac<br>agcctgcc <b>ATTCCGGGGATCCGTCGACC</b> | fragment for <i>lsc</i> knockout                |
| <i>rcsB</i> -KmF | tgaataatctgaatgctatttggccagaccatcctattgttc<br>tgttc <b>GCGATTGTGTAGGCTGGAGCT</b>  | Generation of recombination                     |
| <i>rcsB</i> -KmR | atctaccggcgtcatgcttactgatgacaggtagtaagcaa<br>gcaatat <b>ATTCCGGGGATCCGTCGACC</b>  | fragment for <i>rcsB</i> knockout               |
| <i>lsc</i> -ChF  | CTGCAGCGATCATGGTTATT                                                              | Confirmation of <i>lsc</i> deletion             |
| <i>lsc</i> -ChR  | ACCGCCAATGCGATAG                                                                  |                                                 |
| <i>rcsB</i> -ChF | CGGCAAGCAGTTATGTG                                                                 | Confirmation of <i>rcsB</i> deletion            |
| <i>rcsB</i> -ChR | TAAGAAAGAGCCGGGAAGCGCTAA                                                          |                                                 |
| Cm-F             | TTATACGCAAGGCGACAAGG                                                              | Confirmation of <i>Cm<sup>R</sup></i> insertion |
| Cm-R             | GATCTTCCGTCACAGGTAGG                                                              |                                                 |
| Km-F             | CAGTCATAGCCGAATAGCCT                                                              | Confirmation of <i>Km<sup>R</sup></i> insertion |
| Km-R             | CGGTGCCCTGAATGAACTGC                                                              |                                                 |

<sup>a</sup> Bold, uppercase: sequence homologous to antibiotic resistance gene, lowercase: sequence homologous to gene of interest.

3
